# Supplementary material for: Secreted Ectodomain of SIGLEC-9 and MCP-1 Synergistically Improve Acute Liver Failure in Rats by Altering Macrophage Polarity
Source: PubMed Central journal article supplement (PMC5358744; doi:10.1038/srep44043), 2017-03-08
Supplement: srep44043-s1.pdf [file srep44043-s1.pdf]

## Supplementary Information

### Secreted Ectodomain of SIGLEC-9 and MCP-1 Synergistically Improve Acute Liver Failure in Rats by Altering Macrophage Polarity

<sup>1</sup> Takanori Ito , <sup>1</sup> Masatoshi Ishigami , <sup>2</sup> Yoshihiro Matsushita , <sup>2</sup> Marina Hirata , Kohki  
<sup>2</sup> Matsubara , <sup>1</sup> Tetsuya Ishikawa , <sup>2</sup> Hideharu Hibi , <sup>2</sup> Minoru Ueda , <sup>1</sup> Yoshiki Hirooka  
<sup>1</sup> Hidemi Goto and <sup>2,3</sup> Akihito Yamamoto\*

<sup>1</sup> Department of Gastroenterology and Hepatology,

<sup>2</sup> Department of Oral and Maxillofacial Surgery of Nagoya University Graduate  
School of Medicine, 65 Tsurumai-cho, Showa-ku, Nagoya 466-8550, Japan.

<sup>3</sup> Department of Oral histology, Institute of Biomedical Science, Tokushima  
University Graduate School, 3-18-5 Kuramoto-cho, Tokushima 770-8504, Japan

#### Contact information/Correspondence

Akihito Yamamoto

[akihito@tokushima-u.ac.jp](mailto:akihito@tokushima-u.ac.jp)

3-18-5 Kuramoto-cho, Tokushima

**Supplementary Table S1.**

MCP-1 and sSiglec-9 levels in SHED-CM and in MCP-1- and sSiglec-9-depleted SHED-CM

|                  | <b>MCP-1 (pg/ml)</b> | <b>sSiglec-9 (pg/ml)</b> |
|------------------|----------------------|--------------------------|
| <b>SHED-CM</b>   | 317.3±3.8*           | 569.1±3.3                |
| <b>d-SHED-CM</b> | 18.3±1.0             | ND                       |

MCP-1 and sSiglec-9 levels in SHED-CM and d-SHED-CM were measured by ELISA. Data represent the mean  $\pm$  SEM. ND, not detected. \*  $p < 0.05$ . (SHED-CM vs dSHED-CM)

### Supplementary Table S2.

The numbers of TUNEL or Ki-67 / DAPI positive-stained hepatocytes in Figure3

|                              | <b>TUNEL</b>    | <b>DAPI</b>      |
|------------------------------|-----------------|------------------|
| <b>DMEM</b>                  | 539 (374 - 905) | 749 (609 - 1199) |
| <b>MCP-1/sSiglec-9</b>       | 430 (308 - 577) | 638 (589 - 709)  |
| <b>M(DMEM)-CM</b>            | 540 (400 - 721) | 673 (557 - 868)  |
| <b>M(IL-4)-CM</b>            | 471 (288 - 675) | 660 (534 - 865)  |
| <b>M(MCP-1/sSiglec-9)-CM</b> | 138 (23 - 288)  | 630 (376 - 985)  |
|                              | <b>Ki-67</b>    | <b>DAPI</b>      |
| <b>DMEM</b>                  | 94 (0 - 184)    | 571 (268 - 756)  |
| <b>MCP-1/sSiglec-9</b>       | 98 (48 - 152)   | 619 (528 - 796)  |
| <b>M(DMEM)-CM</b>            | 142 (20 - 344)  | 587 (372 - 864)  |
| <b>M(IL-4)-CM</b>            | 107 (20 - 216)  | 421 (213 - 700)  |
| <b>M(MCP-1/sSiglec-9)-CM</b> | 456 (260 - 920) | 661 (396 - 1272) |

Values are expressed as means (range).

### Supplementary Table S3.

The numbers of TUNEL / DAPI and Ki-67 positive-stained cells in Figure4

|                        | <b>TUNEL</b>    | <b>DAPI</b>      |
|------------------------|-----------------|------------------|
| <b>PBS</b>             | 472 (242 - 667) | 802 (668 - 927)  |
| <b>MCP-1/sSiglec-9</b> | 37(19 - 59)     | 822 (536 - 1010) |
| <b>Ki-67</b>           |                 |                  |
| <b>PBS</b>             | 110 (35 - 224)  |                  |
| <b>MCP-1/sSiglec-9</b> | 281 (231 - 338) |                  |

Values are expressed as means (range).

#### Supplementary Table S4.

The numbers of iNOS or Arginase-1 / CD11b positive-stained cells in Figure6

|                        | <b>iNOS</b>       | <b>CD11b</b> |
|------------------------|-------------------|--------------|
| <b>PBS</b>             | 15 (9 - 37)       | 22 (11 - 38) |
| <b>MCP-1/sSiglec-9</b> | 3 (0 - 8)         | 31 (20 - 50) |
|                        | <b>Arginase-1</b> | <b>CD11b</b> |
| <b>PBS</b>             | 3 (0 - 7)         | 16 (4 - 30)  |
| <b>MCP-1/sSiglec-9</b> | 20(10 - 35)       | 25 (12 - 41) |

Values are expressed as means (range).

**Supplementary Table S5.**

Rat primers for real time q-PCR

| <b>Primer</b>                         | <b>Sequence (forward 5'-3')</b> | <b>Sequence (reverse 5'-3')</b> |
|---------------------------------------|---------------------------------|---------------------------------|
| <b><i>Gapdh</i></b>                   | AAC TTT GGC ATC GT GGA AGG      | CGG ATAC ATT GGG GGT AGGA       |
| <b><i>Il-6</i></b>                    | TTG CCTT CTT GGG ACT GATG       | ACT GGT CTG TTG TGG GTT GGT     |
| <b><i>Il-1<math>\beta</math></i></b>  | CAG GAT GAG GAC CCA AGCAC       | TCAG ACAG CAC GAG GCATTT        |
| <b><i>Tnf-<math>\alpha</math></i></b> | CTC GAG TGACA AGCCCGTAG         | CCTTGA AGAGA ACCTGGGAGTAG       |
| <b><i>iNos</i></b>                    | GGC AGG ATGAGA AGCTGAGG         | CCGCATTAGCACAGAAGCAA            |
| <b><i>Caspase-1</i></b>               | GGAGCTTCAGTCAGGTCCATC           | CGCCACCTTCTTTGTTTCAGTTT         |
| <b><i>Il-10</i></b>                   | GCCTGCTCTTACTGGCTGGA            | TCTGGCTGACTGGGAAGTGG            |
| <b><i>Tgf-<math>\beta</math></i></b>  | CCGCAACAACGCAATCTATG            | GCACTGCTTCCCGAATGTCT            |
| <b><i>Ym-1</i></b>                    | TGCCAACATCAGCAACAACA            | CCATCCTCCAACAGACAGCA            |
| <b><i>Cd206</i></b>                   | GCAGGTGGTTTATGGGATGTTT          | TTTGGGTTTCAGGAGTTGTTGTG         |
| <b><i>Arg-1</i></b>                   | CACCTGAGTTTTGATGTTGATGG         | TCCTGAAAGTAGCCCTGTCTTGT         |
| <b><i>Ccr2</i></b>                    | AGAGGCATAGGGCTGTGAGG            | CCTGGAAGGTGGTCAGGAAG            |
| <b><i>Cd11b</i></b>                   | TACCGGAAGGTGTCAGCAAG            | TTAGCGGGAAGATGGGATG             |
| <b><i>Hgf</i></b>                     | GCAAGACATGTCAGCGCTGG            | CCAAGGGGTGTCAGGGTCAA            |
| <b><i>Vegf</i></b>                    | ACCAAAGCCAGCACATAGGA            | GGGGCATTAACTGCATCTGG            |
| <b><i>Igf</i></b>                     | GCTGTGTAAACGACCCGGGA            | ACTGAAGAGCGTCCACCAGC            |

**Supplementary Figure S1.**

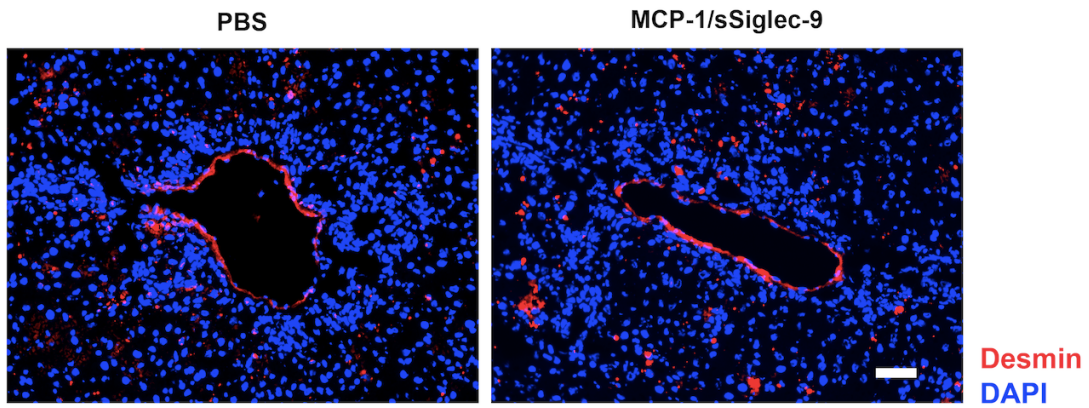

**MCP-1 and sSiglec-9 have little or no effect on the activation of hepatic stellate cells**

Representative images of Desmin immunofluorescence staining of the livers, 12 h after MCP-1/sSiglec-9 or PBS injection. Scale bar: 50  $\mu$ m.
